# Supplementary material for: Patient-specific Boolean models of signalling networks guide personalised treatments
Source: eLife journal article supplement (doi:10.7554/elife.72626), 2022-02-01
Supplement: supp [file elife_poa_e72626_Supplementary_file_7.xlsx]

## Sheet: Key Resources Table
	Key Resources Table
	Reagent type (species) or resource	Designation	Source or reference	Identifiers	Additional information
	gene (Homo-sapiens)	AKT1	HGNC	HGNC:391
	gene (Homo-sapiens)	AKT2	HGNC	HGNC:392
	gene (Homo-sapiens)	AKT3	HGNC	HGNC:393
	gene (Homo-sapiens)	AR	HGNC	HGNC:644
	gene (Homo-sapiens)	CASP8	HGNC	HGNC:1509
	gene (Homo-sapiens)	CFLAR	HGNC	HGNC:1876
	gene (Homo-sapiens)	EGFR	HGNC	HGNC:3236
	gene (Homo-sapiens)	MAPK1	HGNC	HGNC:6871
	gene (Homo-sapiens)	MAPK3	HGNC	HGNC:6877
	gene (Homo-sapiens)	SLC2A1	HGNC	HGNC:11005
	gene (Homo-sapiens)	HIF1A	HGNC	HGNC:4910
	gene (Homo-sapiens)	HSP90AA1	HGNC	HGNC:5253
	gene (Homo-sapiens)	HSP90AB1	HGNC	HGNC:5258
	gene (Homo-sapiens)	HSP90B1	HGNC	HGNC:12028
	gene (Homo-sapiens)	HSPA1A	HGNC	HGNC:5232
	gene (Homo-sapiens)	HSPA1B	HGNC	HGNC:5233
	gene (Homo-sapiens)	HSPB1	HGNC	HGNC:5246
	gene (Homo-sapiens)	MAP2K1	HGNC	HGNC:6840
	gene (Homo-sapiens)	MAP2K2	HGNC	HGNC:6842
	gene (Homo-sapiens)	MYC	HGNC	HGNC:7553
	gene (Homo-sapiens)	MAX	HGNC	HGNC:6913
	gene (Homo-sapiens)	CDKN2A	HGNC	HGNC:1787
	gene (Homo-sapiens)	PIK3CA	HGNC	HGNC:8975
	gene (Homo-sapiens)	PIK3CB	HGNC	HGNC:8976
	gene (Homo-sapiens)	PIK3CG	HGNC	HGNC:8978
	gene (Homo-sapiens)	PIK3CD	HGNC	HGNC:8977
	gene (Homo-sapiens)	PIK3R1	HGNC	HGNC:8979
	gene (Homo-sapiens)	PIK3R2	HGNC	HGNC:8980
	gene (Homo-sapiens)	PIK3R3	HGNC	HGNC:8981
	gene (Homo-sapiens)	PIK3R4	HGNC	HGNC:8982
	gene (Homo-sapiens)	PIK3R5	HGNC	HGNC:30035
	gene (Homo-sapiens)	PIK3R6	HGNC	HGNC:27101
	gene (Homo-sapiens)	PIK3C2A	HGNC	HGNC:8971
	gene (Homo-sapiens)	PIK3C2B	HGNC	HGNC:8972
	gene (Homo-sapiens)	PIK3C2G	HGNC	HGNC:8973
	gene (Homo-sapiens)	PIK3C3	HGNC	HGNC:8974
	gene (Homo-sapiens)	NOX1	HGNC	HGNC:7889
	gene (Homo-sapiens)	NOX3	HGNC	HGNC:7890
	gene (Homo-sapiens)	NOX4	HGNC	HGNC:7891
	gene (Homo-sapiens)	NOX2	HGNC	HGNC:2578
	gene (Homo-sapiens)	SPOP	HGNC	HGNC:11254
	gene (Homo-sapiens)	TERT	HGNC	HGNC:11730
	cell line (Homo-sapiens)	LNCaP clone FGC, prostate carcinoma (normal, Adult)	ATCC	CRL-1740	RRID:CVCL_1379
	chemical compound, drug	RPMI 1640 Medium, GlutaMAX™ Supplement	Gibco	61870-010
	chemical compound, drug	17-DMAG, an Hsp90 inhibitor	Sigma-Aldrich	100069	(Pacey et al., 2011); DOI 10.1158/1078-0432.CCR-10-1927
	chemical compound, drug	NMS-E973, an Hsp90 inhibitor	MedChemExpress	HY-17547	(Fogliatto et al., 2013); DOI 10.1158/1078-0432.CCR-12-3512
	chemical compound, drug	Pictilisib, an inhibitor of PI3Kα/δ	Thermo Scientific	467861000	(Zhan et al., 2017); DOI 10.1021/acs.jmedchem.7b00357
	chemical compound, drug	PI-103, a multi-targeted PI3K inhibitor for p110α/β/δ/γ	Sigma-Aldrich	528100	(Raynaud et al., 2009); DOI 10.1158/1535-7163.MCT-08-1200
	chemical compound, drug	Resazurin	Sigma-Aldrich	R7017	(Szebeni et al., 2017); DOI 10.3390/ijms18102105
	chemical compound, drug	Dimethyl sulfoxide (DMSO)	Sigma-Aldrich	D8418
	chemical compound, drug	Foetal bovine serum (FBS)	Gibco	16140-071
	chemical compound, drug	PenStrep antibiotics (Penicillin G sodium salt, and Streptomycin sulfate salt)	Sigma-Aldrich	P4333
	software, algorithm	R language	https://www.R-project.org/		RRID:SCR_001905
	software, algorithm	Python language	https://www.python.org/		RRID:SCR_008394
	software, algorithm	MaBoSS	https://github.com/ maboss-bkmc/MaBoSS-env-2.0		(Stoll et al., 2017, 2012); DOI 10.1186/1752-0509-6-116; DOI 10.1093/bioinformatics/btx123
	software, algorithm	High-throughput mutant analysis	https://github.com/sysbio-curie/Logical_modelling_pipeline		(Montagud et al., 2017); DOI 10.1093/bib/bbx163
	software, algorithm	PROFILE	https://github.com/ sysbio-curie/PROFILE		(Béal et al., 2019); DOI 10.3389/fphys.2018.01965
	software, algorithm	PROFILE_v2	https://github.com/ ArnauMontagud/PROFILE_v2		This work. Main text, Section "Personalisation of the prostate Boolean model" and Appendix 1, Sections 3,4,5 and 6.
	software, algorithm	Prostate Boolean model	https://www.ebi.ac.uk/ biomodels/MODEL2106070001; http://ginsim.org/model/signalling-prostate-cancer		This work. Main text, Section "Prostate Boolean model construction" and Appendix 1, Section 1.
